# Supplementary material for: Early Peritoneal CC Chemokine Production Correlates with Divergent Inflammatory Phenotypes and Susceptibility to Experimental Arthritis in Mice
Source: Hindawi journal article supplement (doi:10.1155/2019/2641098), 2019-02-26
Supplement: f1 [file 2641098.f1.pdf]

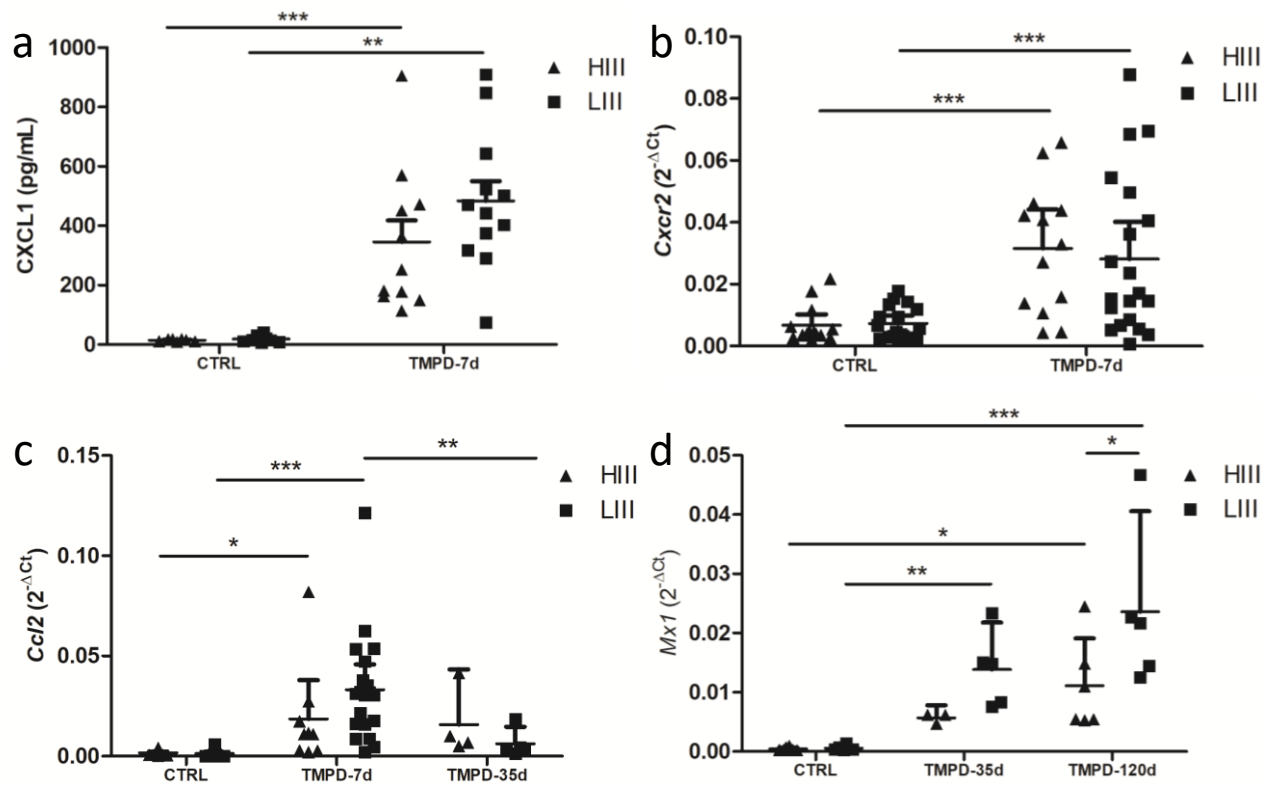

Figure S1: PerC CXCL1 levels (a), *Cxcr2* (b), *Ccl2* (c) and *Mx1* (d) gene expression in peritoneal infiltrating leukocytes of HIII and LIII mice injected with pristane. Mice were injected with pristane (TMPD) or saline (CTRL) and peritoneal lavage fluid was harvested after 7 (a-b), 7 and 35 (c) or 35 and 120 days. Bars represent mean $\pm$ 95% confidence interval of 1-3 experiments with 4-6 animals/group (two-way ANOVA followed by Bonferroni post-tests). \* $p < 0,05$ ; \*\* $p < 0,01$ ; \*\*\* $p < 0,001$ .
