# Supplementary material for: Early Peritoneal CC Chemokine Production Correlates with Divergent Inflammatory Phenotypes and Susceptibility to Experimental Arthritis in Mice
Source: Hindawi journal article supplement (doi:10.1155/2019/2641098), 2019-02-26
Supplement: f2 [file 2641098.f2.pdf]

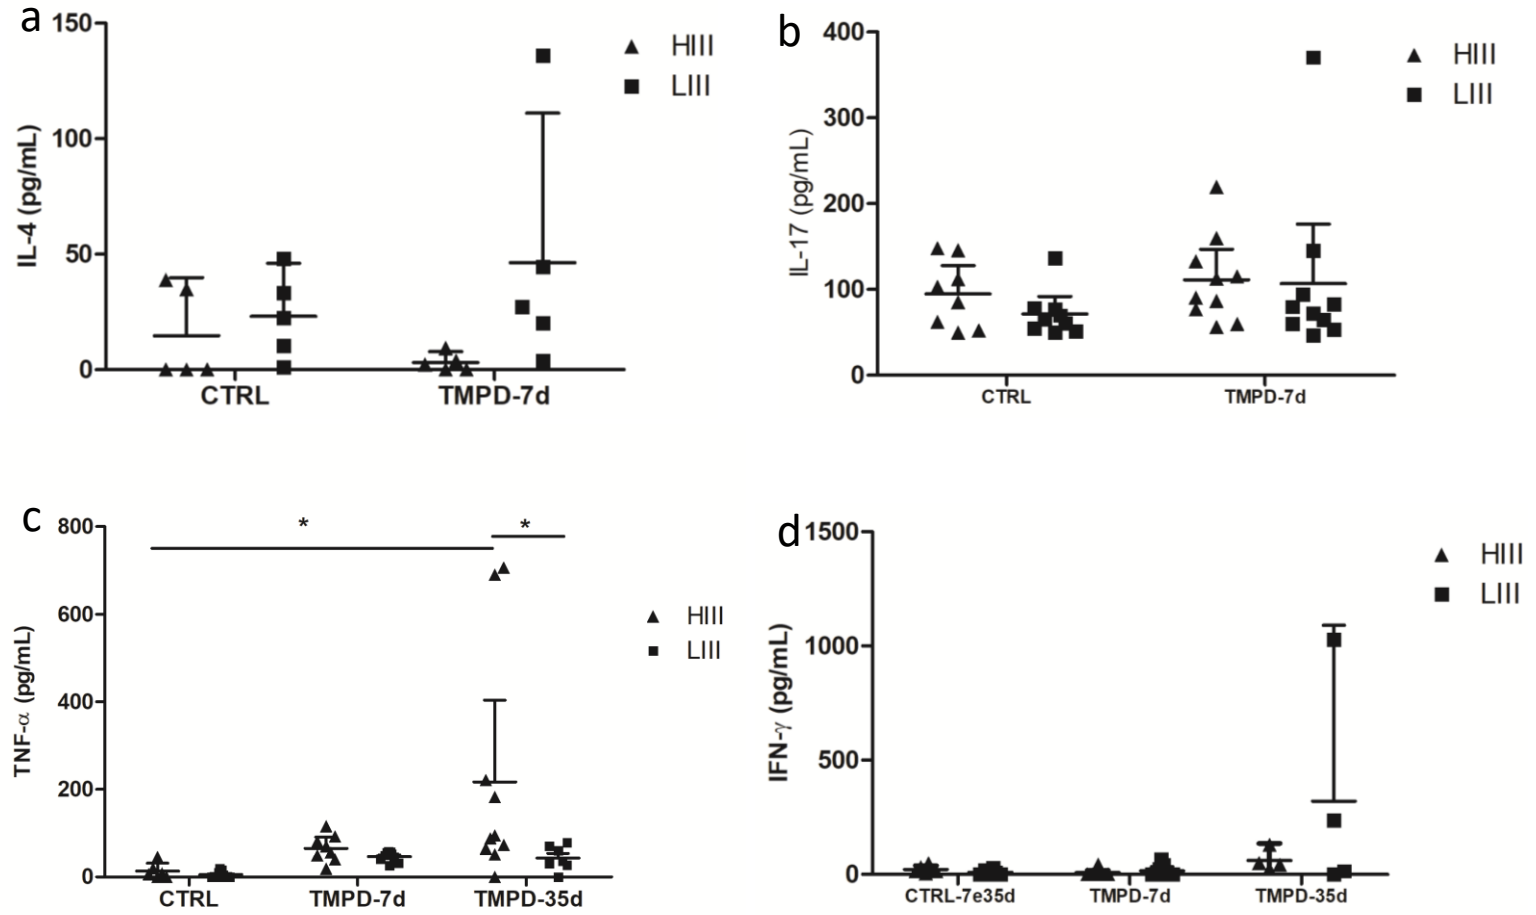

Figure S2: PerC cytokine levels of HIII and LIII mice injected with pristane. Mice were injected with pristane (TMPD) or saline (CTRL) and peritoneal lavage fluid was harvested after either 7 days (IL-4 - a; IL-17 - b) or 7 and 35 days (TNF- $\alpha$  - c; IFN- $\gamma$  - d). Bars represent mean $\pm$ 95% confidence interval of 1 or 2 experiments with 4-6 animals/group (two-way ANOVA followed by Bonferroni post-tests). \*p<0,05; \*\*p<0,01; \*\*\*p<0,001.
